# Supplementary material
Source: publisher site journal article supplement (https://www.dovepress.com/article/279684)
Supplement: Supplementary file 1 [file get_supplementary_file.php]

## **Supplementary Information**

**Supplementary Document.** Protocol of immunohistochemistry

**Table S1.** Antibody Sources and Staining Conditions.

**Figure S1.** The Kaplan–Meier survival analysis assessed the prognostic value of macrophages (A), neutrophils (B), dendritic cells (C) and mast cells (D).

## Protocol of IHC

TMA sections were deparaffinized in xylene and hydrated with distilled water. After the endogenous peroxidase was inhibited by treating with 3% H<sub>2</sub>O<sub>2</sub> for 30 minutes, the sections were heated in a pressure cooker for 5 minutes in unmasking solution (0.01 M sodium citrate buffer, pH ¼ 6) and then incubated with 10% normal goat serum for 30 minutes. Primary antibodies were applied overnight in a moist chamber at 4 °C. After the primary antibody was washed off, the sections were then washed and incubated with secondary antibodies followed by incubation with DAB.

**Table S1. Antibody Sources and Staining Conditions**

| <b>Markers</b> | <b>Main target</b> | <b>Antibody source</b> | <b>Product number</b> | <b>Dilution</b> |
|----------------|--------------------|------------------------|-----------------------|-----------------|
| CD68           | Macrophage         | Dako                   | Clone PG-M1           | 1:200           |
| Tryptase       | Mast cell          | Abcam                  | ab134932              | 1:15000         |
| CD1a           | Dendritic cell     | Abcam                  | ab108309              | 1:150           |
| CD66b          | Neutrophil         | BD Biosciences         | Clone G10F5,          | 1:100           |

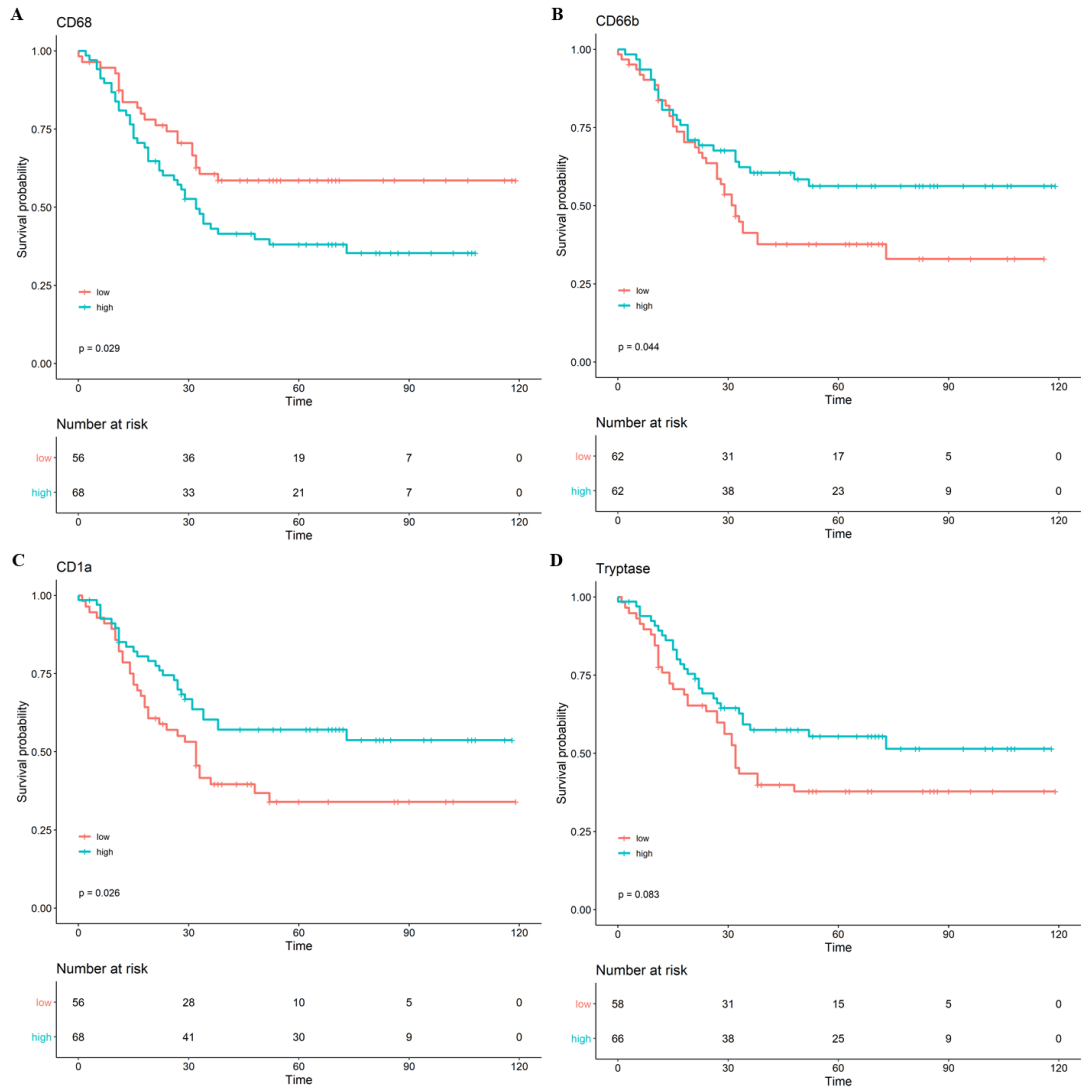

Fig.S1
